# Supplementary material for: Metallogenic Mechanism of Carlin-Type Gold Deposit in Zhen’an-Xunyang Basin, in the South Qinling of China: Constraints of In Situ Trace Elements and S Isotopes from Newly Discovered Wangzhuang Gold Deposit
Source: MDPI journal article supplement (doi:10.3390/min13111459), 2023-11-20
Supplement: s1 [file s1]

**Table S1.** Detailed EPMA compositions of the pyrite and arsenopyrite from the Wangzhuang gold deposit(wt%).

| Sampling location | mineral | Au   | Ag   | Co   | Ni   | S     | Te   | Sb   | Pb   | As    | Se   | Cu   | Fe    | Zn   | Total  |
|-------------------|---------|------|------|------|------|-------|------|------|------|-------|------|------|-------|------|--------|
| ZK7-2             | Py4     | 0.07 | bdl  | 0.09 | bdl  | 53.49 | bdl  | 0.03 | bdl  | 0.45  | bdl  | 0.03 | 46.03 | bdl  | 100.18 |
| ZK7-2             | Py4     | 0.01 | 0.04 | 0.26 | 0.28 | 53.33 | bdl  | 0.01 | 0.19 | 0.04  | bdl  | 0.14 | 44.73 | 0.03 | 99.07  |
| ZK7-2             | Py4     | 0.01 | bdl  | 0.09 | 0.01 | 52.83 | 0.05 | bdl  | bdl  | 0.58  | bdl  | 0.02 | 45.37 | bdl  | 98.96  |
| ZK7-2             | Py4     | bdl  | 0.01 | 0.12 | bdl  | 53.12 | 0.02 | bdl  | bdl  | 0.47  | bdl  | 0.01 | 45.53 | bdl  | 99.27  |
| ZK7-2             | Py3     | 0.2  | bdl  | 0.06 | 0.04 | 51.57 | bdl  | 0.07 | bdl  | 2.95  | bdl  | bdl  | 45.41 | 0.02 | 100.32 |
| ZK7-2             | Py3     | 0.15 | bdl  | 0.08 | 0.03 | 45.21 | bdl  | bdl  | bdl  | 10.38 | bdl  | 0.03 | 43.94 | bdl  | 99.81  |
| ZK7-3             | Py3     | 0.14 | bdl  | 0.03 | 0.05 | 50.96 | bdl  | bdl  | 0.08 | 3.59  | bdl  | bdl  | 44.93 | bdl  | 99.79  |
| ZK7-2             | Py3     | 0.09 | bdl  | 0.06 | 0.27 | 53.64 | 0.02 | bdl  | bdl  | 1.42  | bdl  | bdl  | 43.18 | 0.09 | 98.77  |
| ZK15-1            | Py3     | 0.09 | 0.01 | 0.04 | 0.03 | 51.30 | bdl  | 0.02 | 0.04 | 4.53  | bdl  | bdl  | 45.17 | 0.02 | 101.26 |
| ZK103-1           | Py3     | 0.08 | bdl  | 0.06 | 0.08 | 53.63 | bdl  | 0.03 | 0.01 | 1.35  | bdl  | 0.02 | 45.03 | 0.02 | 100.30 |
| ZK103-1           | Py3     | 0.06 | 0.01 | 0.07 | 0.02 | 53.51 | 0.06 | bdl  | bdl  | 1.49  | bdl  | bdl  | 45.34 | bdl  | 100.55 |
| ZK7-2             | Py3     | 0.05 | bdl  | 0.03 | 0.24 | 51.70 | bdl  | 0.05 | bdl  | 3.50  | bdl  | bdl  | 45.09 | bdl  | 100.66 |
| ZK7-2             | Py3     | 0.05 | 0.01 | 0.17 | 0.6  | 51.93 | 0.01 | 0.04 | bdl  | 2.22  | bdl  | bdl  | 44.66 | bdl  | 99.69  |
| ZK103-1           | Py3     | bdl  | bdl  | 0.05 | 0.03 | 52.60 | 0.01 | bdl  | bdl  | 2.16  | bdl  | bdl  | 45.56 | bdl  | 100.41 |
| ZK7-2             | Apy     | 0.25 | 0.02 | 0.01 | 0.02 | 20.42 | 0.01 | 0.01 | 0.05 | 43.26 | bdl  | bdl  | 34.81 | bdl  | 98.87  |
| ZK103-1           | Apy     | 0.16 | bdl  | 0.03 | 0.01 | 21.99 | bdl  | bdl  | bdl  | 42.42 | bdl  | bdl  | 35.68 | bdl  | 100.30 |
| ZK15-1            | Apy     | 0.15 | 0.02 | 0.03 | bdl  | 22.45 | 0.03 | bdl  | bdl  | 42.39 | bdl  | 0.01 | 35.52 | 0.03 | 100.64 |
| ZK103-1           | Apy     | 0.15 | bdl  | 0.04 | 0.04 | 22.36 | 0.05 | bdl  | 0.06 | 42.32 | bdl  | 0.05 | 35.19 | bdl  | 100.26 |
| ZK103-1           | Apy     | 0.05 | 0.03 | 0.03 | 0.02 | 21.17 | 0.06 | 0.04 | bdl  | 42.96 | bdl  | bdl  | 35.24 | 0.02 | 99.61  |
| ZK15-1            | Apy     | 0.03 | bdl  | 0.04 | 0.02 | 21.30 | bdl  | 0.03 | 0.04 | 42.96 | bdl  | bdl  | 35.72 | 0.03 | 100.17 |
| ZK103-1           | Apy     | 0.02 | 0.02 | 0.04 | bdl  | 21.95 | 0.01 | 0.02 | bdl  | 42.30 | bdl  | bdl  | 35.10 | 0.03 | 99.49  |
| ZK7-2             | Apy     | bdl  | bdl  | 0.05 | 0.05 | 26.13 | bdl  | bdl  | 0.02 | 36.41 | bdl  | bdl  | 36.84 | 0.02 | 99.53  |
| ZK11-1            | Py2     | bdl  | bdl  | 0.17 | 0.53 | 53.41 | bdl  | bdl  | bdl  | 0.11  | 0.01 | 0.04 | 44.23 | 0.06 | 98.55  |
| ZK103-1           | Py2     | bdl  | bdl  | 0.16 | 0.45 | 53.89 | bdl  | bdl  | bdl  | 0.09  | bdl  | bdl  | 45.88 | 0.02 | 100.49 |
| ZK7-2             | Py2     | bdl  | bdl  | 0.05 | bdl  | 54.33 | 0.04 | 0.03 | bdl  | 0.03  | bdl  | bdl  | 45.75 | 0.01 | 100.25 |
| ZK11-1            | Py1     | bdl  | bdl  | 0.14 | 0.2  | 54.69 | 0.01 | bdl  | 0.1  | 0.01  | bdl  | bdl  | 46.10 | bdl  | 101.25 |
| ZK15-1            | Py1     | bdl  | bdl  | 0.02 | bdl  | 54.46 | bdl  | 0.02 | 0.01 | bdl   | bdl  | bdl  | 46.21 | bdl  | 100.71 |

Note: bdl-below the detection limit.

**Table S2.** Detailed LA-MC-ICP-MS In-situ S isotopic compositions of pyrite and arsenopyrite from the Wangzhaung gold deposit.

| Sample Number | Pyrite type | $\delta^{34}\text{S}$ (‰) |
|---------------|-------------|---------------------------|
| ZK7-2TZ5      | Py4         | 0.3                       |
| ZK7-2TZ4      | Py4         | 4.1                       |
| ZK7-2TZ2      | Py4         | 2.1                       |
| ZK7-1TZ1      | Py4         | 5.3                       |
| ZK7-2TZ4      | Py3         | 11.2                      |
| ZK7-2TZ4      | Py3         | 10.3                      |
| ZK7-2TZ4      | Py3         | 9.9                       |
| ZK7-2TZ2      | Py3         | 9.4                       |
| Zk7-1TZ4      | Py3         | 10                        |
| ZK7-1TZ3      | Py3         | 9.7                       |
| ZK7-1TZ1      | Py3         | 8.7                       |
| ZK15-1TZ2(1)  | Py3         | 10.4                      |
| ZK15-1TZ2(1)  | Py3         | 10.3                      |
| ZK15-1TZ2(1)  | Py3         | 10.2                      |
| ZK15-1TZ2(1)  | Py3         | 10.2                      |
| ZK15-1TZ2(1)  | Py3         | 10                        |
| ZK103-1TZ4(2) | Py3         | 9.8                       |
| ZK103-1TZ4(2) | Py3         | 9.6                       |
| ZK103-1TZ4(2) | Py3         | 9.6                       |

|               |     |      |
|---------------|-----|------|
| ZK103-1TZ4(2) | Py3 | 9.6  |
| ZK103-1TZ4(2) | Py3 | 9.5  |
| ZK103-1TZ4(2) | Py3 | 9.4  |
| ZK103-1TZ4(2) | Py3 | 9.4  |
| ZK103-1TZ3    | Py3 | 8.4  |
| ZK103-1TZ3    | Py3 | 7.4  |
| ZK103-1TZ3    | Py3 | 5.5  |
| ZK103-1TZ2(2) | Py3 | 8.8  |
| ZK103-1TZ2(2) | Py3 | 7.9  |
| ZK7-1TZ3      | Apy | 10.9 |
| ZK7-1TZ3      | Apy | 10.4 |
| ZK7-1TZ3      | Apy | 10.4 |
| zk7-1TZ2      | Apy | 9.7  |
| zk7-1TZ2      | Apy | 9.5  |
| zk7-1TZ2      | Apy | 9.4  |
| zk7-1TZ2      | Apy | 9.32 |
| zk7-1TZ2      | Apy | 9.2  |
| zk7-1TZ2      | Apy | 9.1  |
| zk7-1TZ2      | Apy | 9.1  |
| zk7-1TZ2      | Apy | 9    |
| zk7-1TZ2      | Apy | 8.9  |
| zk7-1TZ2      | Apy | 8.9  |
| zk7-1TZ2      | Apy | 8.8  |
| zk7-1TZ2      | Apy | 8.8  |
| zk7-1TZ2      | Apy | 8.5  |
| zk7-1TZ2      | Apy | 8.4  |
| ZK7-1TZ1      | Apy | 10.3 |
| ZK7-1TZ1      | Apy | 9.8  |
| ZK7-1TZ1      | Apy | 9.2  |
| ZK7-1TZ1      | Apy | 9.2  |
| ZK7-1TZ1      | Apy | 8.8  |
| ZK7-1TZ1      | Apy | 8.5  |
| ZK7-1TZ1      | Apy | 8.5  |
| ZK7-2TZ4      | Py2 | 15.8 |
| ZK7-1TZ1      | Py2 | 18.2 |
| ZK15-1TZ2(1)  | Py2 | 28.7 |
| ZK15-1TZ2(1)  | Py2 | 27.9 |
| ZK15-1TZ2(1)  | Py2 | 27.8 |
| ZK15-1TZ2(1)  | Py2 | 26.7 |
| ZK15-1TZ2(1)  | Py2 | 25.9 |
| ZK103-1TZ4(2) | Py2 | 24.3 |
| ZK103-1TZ4(2) | Py2 | 23.4 |
| ZK103-1TZ4(2) | Py2 | 21.8 |
| ZK103-1TZ4(2) | Py2 | 18.7 |
| ZK103-1TZ4(2) | Py2 | 17.7 |
| ZK103-1TZ4(2) | Py2 | 17.6 |
| ZK103-1TZ4(2) | Py2 | 17.5 |
| ZK103-1TZ4(2) | Py2 | 17.1 |
| ZK7-1TZ1      | Py1 | 31.2 |

---
